# Supplementary material for: Conformational modifications induced by internal tandem duplications on the FLT3 kinase and juxtamembrane domains
Source: Royal Society of Chemistry journal article supplement (doi:10.1039/c9cp02938a), 2019-01-01
Supplement: c9cp02938a1.pdf [file c9cp02938a1.pdf]

# **Conformational Modifications Induced by Internal Tandem Duplications on the FLT3 Kinase and Juxtamembrane Domains Supporting Information**

Guido Todde\* and Ran Friedman\*

*Department of Chemistry and Biomedical Sciences, Faculty of Health and Life Sciences, Linnæus  
University, 391 82 Kalmar, Sweden*

E-mail: [guido.todde@lnu.se](mailto:guido.todde@lnu.se); [ran.friedman@lnu.se](mailto:ran.friedman@lnu.se)

## Supporting Information Available

The Supporting Information contain a superposition of the 5 starting models of the wt FLT3 (1), the potential energy, RMSD, SASA, and radius of gyration calculated from the equilibration of all systems (2-8), the PCA of the entire protein (9), contact map between the ITDs and the  $\alpha$ C-helix (10), the contact map difference between the FLT3-ITD and the native protein of the distances between the JM-B motif and the activation loop and the catalytic loop (11), the contact map difference between the FLT3-ITD and the native protein of the distances between the JM-S and two portions (residues 805-810 and 862-867) of the C-lobe (12).

| model | Dope score |
|-------|------------|
|-------|------------|

|   |       |
|---|-------|
| 1 | -0.75 |
| 2 | -0.78 |
| 3 | -0.80 |
| 4 | -0.74 |
| 5 | -0.74 |

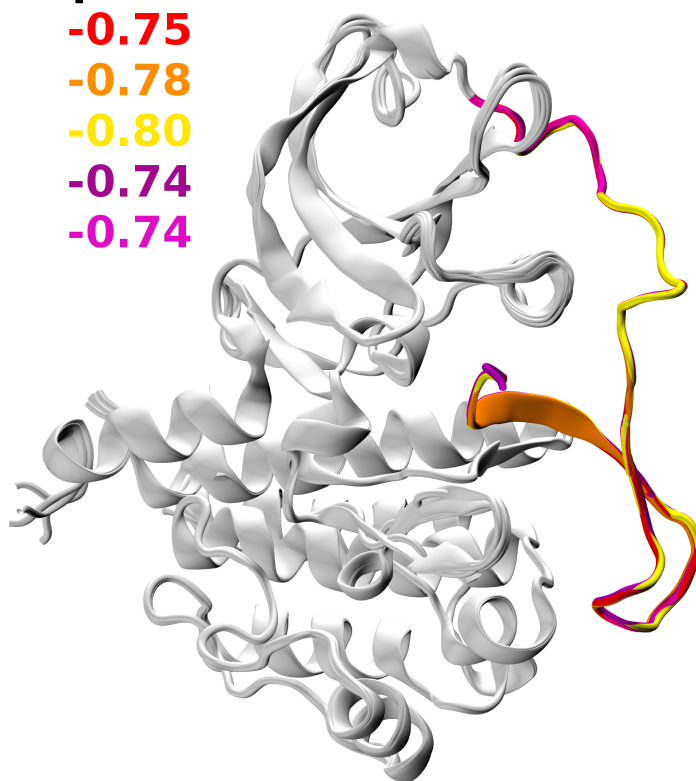

Figure 1: Superposition of the 5 models generated from the PDB entries 4XUF, 4RT7, and 4RJB. The DOPE score obtained for the different models are also reported.

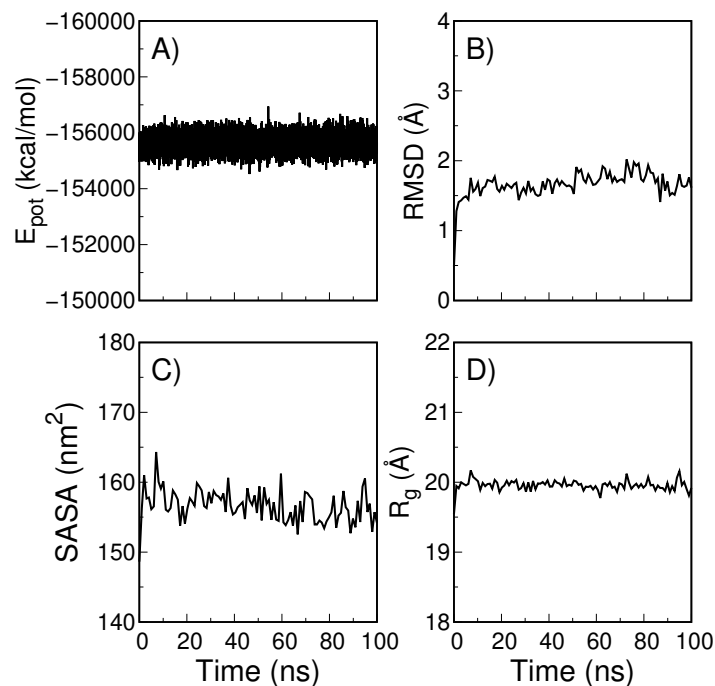

Figure 2: Parameters variation calculated from the equilibration simulations of the wt FLT3. A) Potential energy, B)  $C\alpha$  RMSD, C) SASA, D) Radius of gyration. All properties have stabilised well before the 100 ns time point.

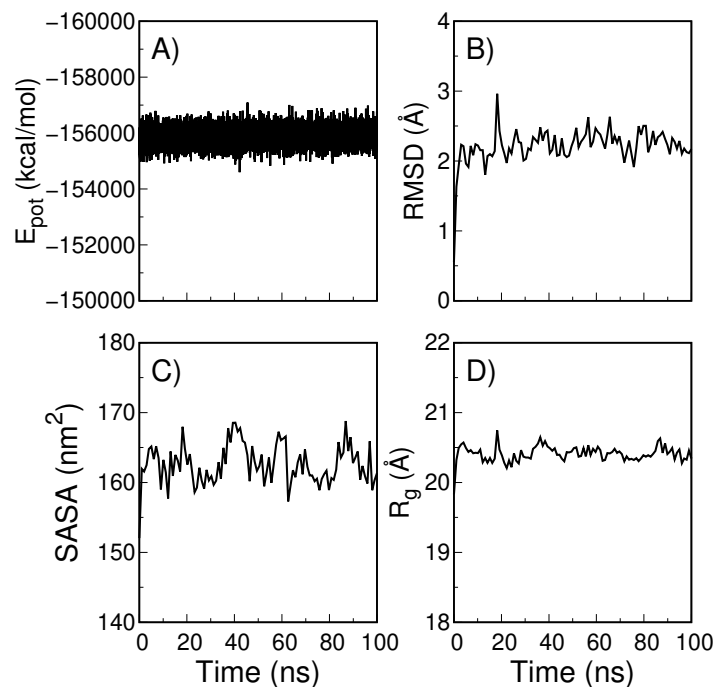

Figure 3: Parameters variation calculated from the equilibration simulations of the LDN-ITD. A) Potential energy, B)  $C\alpha$  RMSD, C) SASA, D) Radius of gyration. All properties have stabilised well before the 100 ns time point.

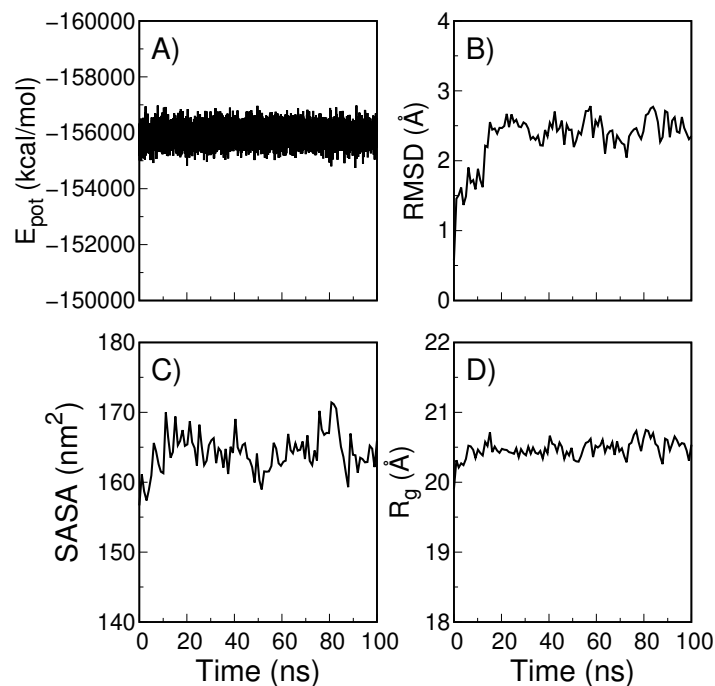

Figure 4: Parameters variation calculated from the equilibration simulations of the DQN-ITD. A) Potential energy, B) C $\alpha$  RMSD, C) SASA, D) Radius of gyration. All properties have stabilised well before the 100 ns time point.

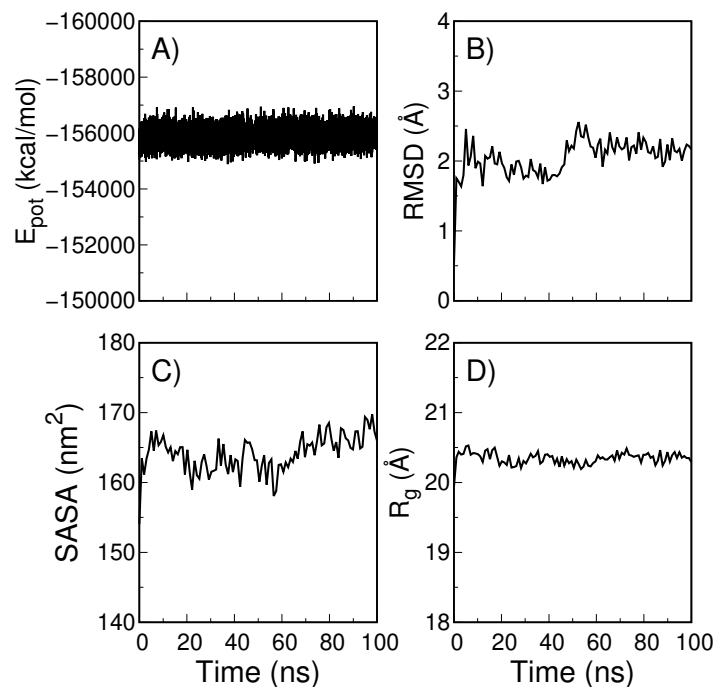

Figure 5: Parameters variation calculated from the equilibration simulations of the DYV-ITD. A) Potential energy, B) C $\alpha$  RMSD, C) SASA, D) Radius of gyration. All properties have stabilised well before the 100 ns time point.

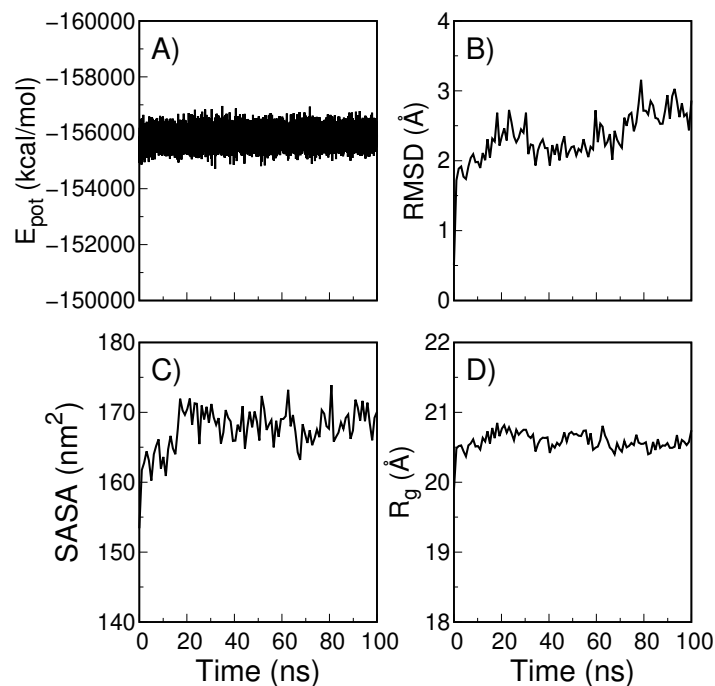

Figure 6: Parameters variation calculated from the equilibration simulations of the EYE-ITD. A) Potential energy, B)  $C\alpha$  RMSD, C) SASA, D) Radius of gyration. All properties have stabilised well before the 100 ns time point.

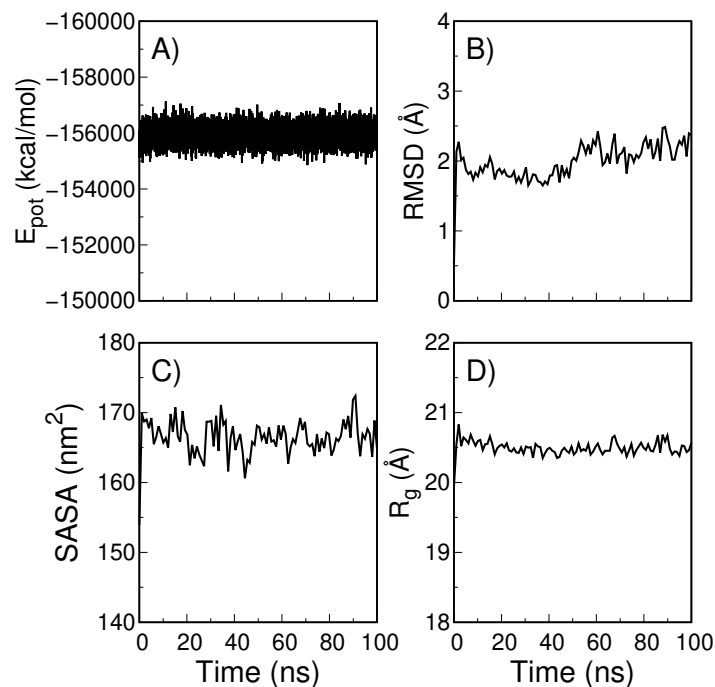

Figure 7: Parameters variation calculated from the equilibration simulations of the FRE-ITD. A) Potential energy, B)  $C\alpha$  RMSD, C) SASA, D) Radius of gyration. All properties have stabilised well before the 100 ns time point.

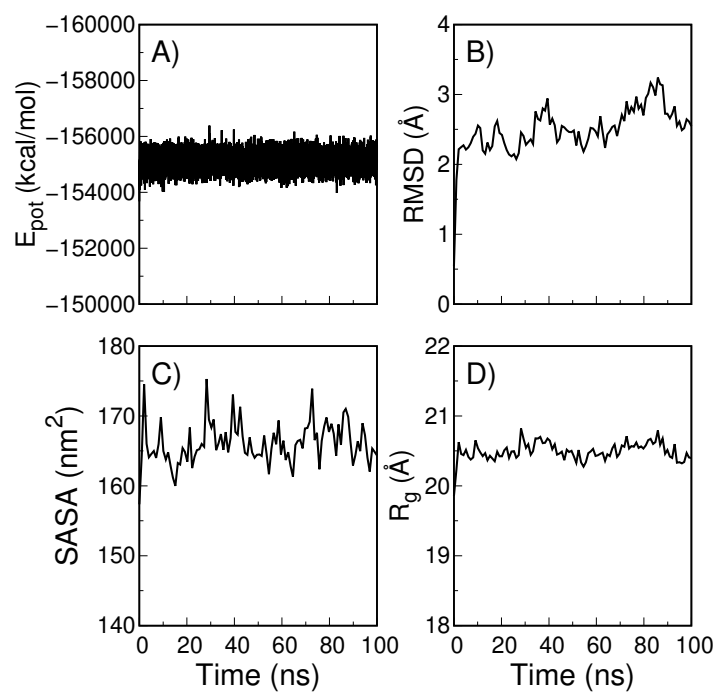

Figure 8: Parameters variation calculated from the equilibration simulations of the FEI-ITD. A) Potential energy, B) C $\alpha$  RMSD, C) SASA, D) Radius of gyration. All properties have stabilised well before the 100 ns time point.

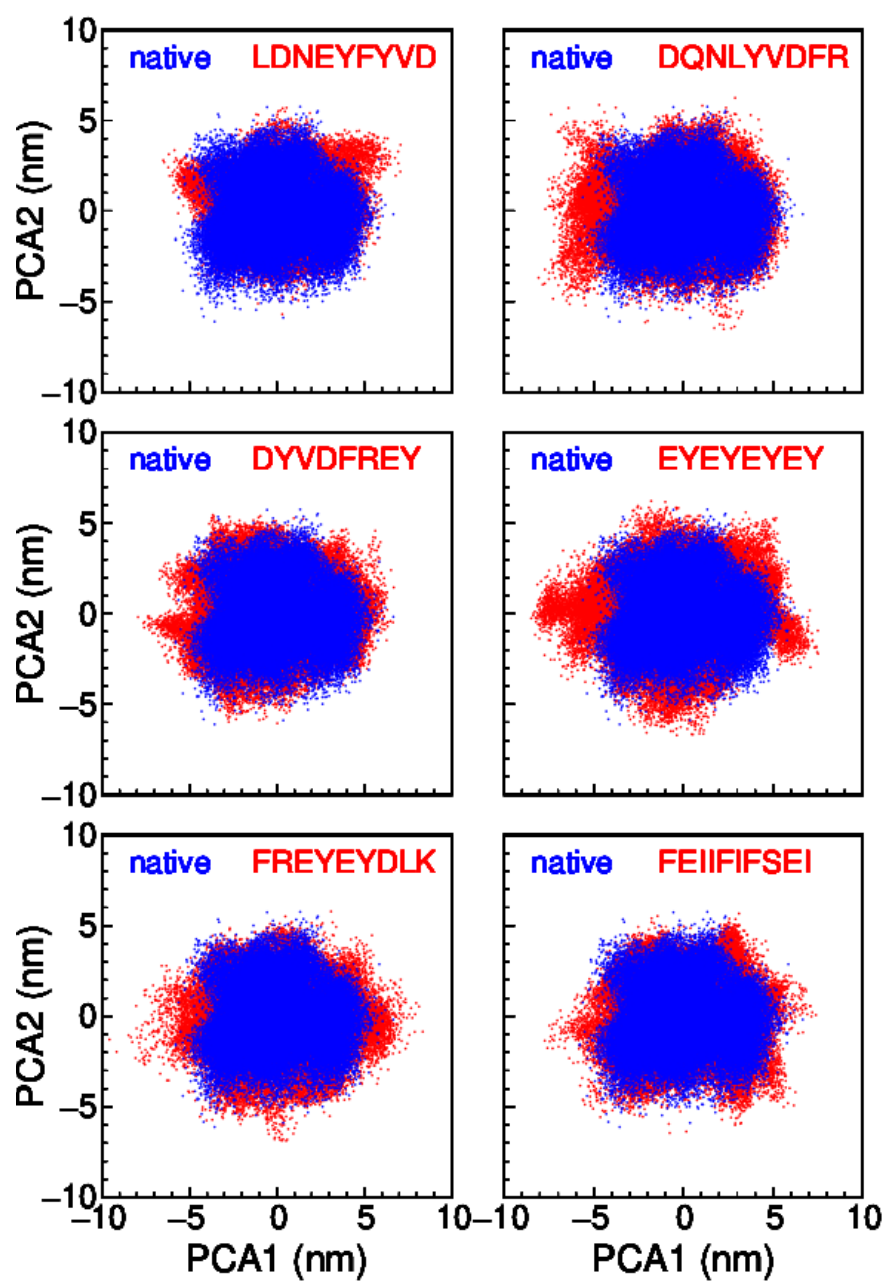

Figure 9: Projection of all protein heavy atoms (non hydrogen atoms) in phase space along the first two principal eigenvectors. The native protein is shown in blue while the FLT3-ITD are shown in red.

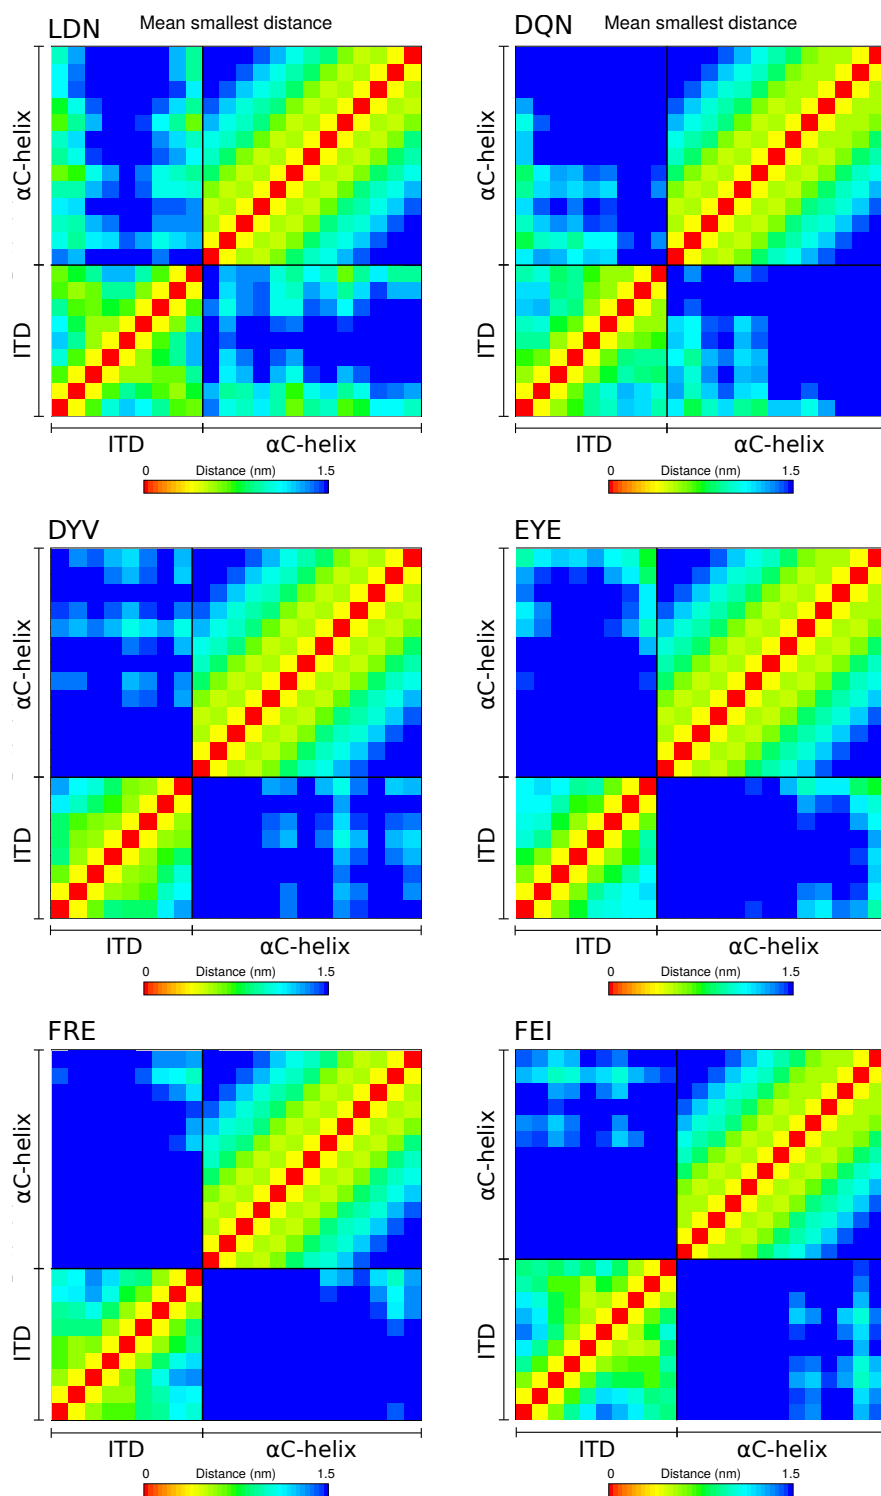

Figure 10: Contacts map calculated between the ITD sequences and the  $\alpha$ C-helix. Distances are calculated using the  $C_{\alpha}$  atoms.



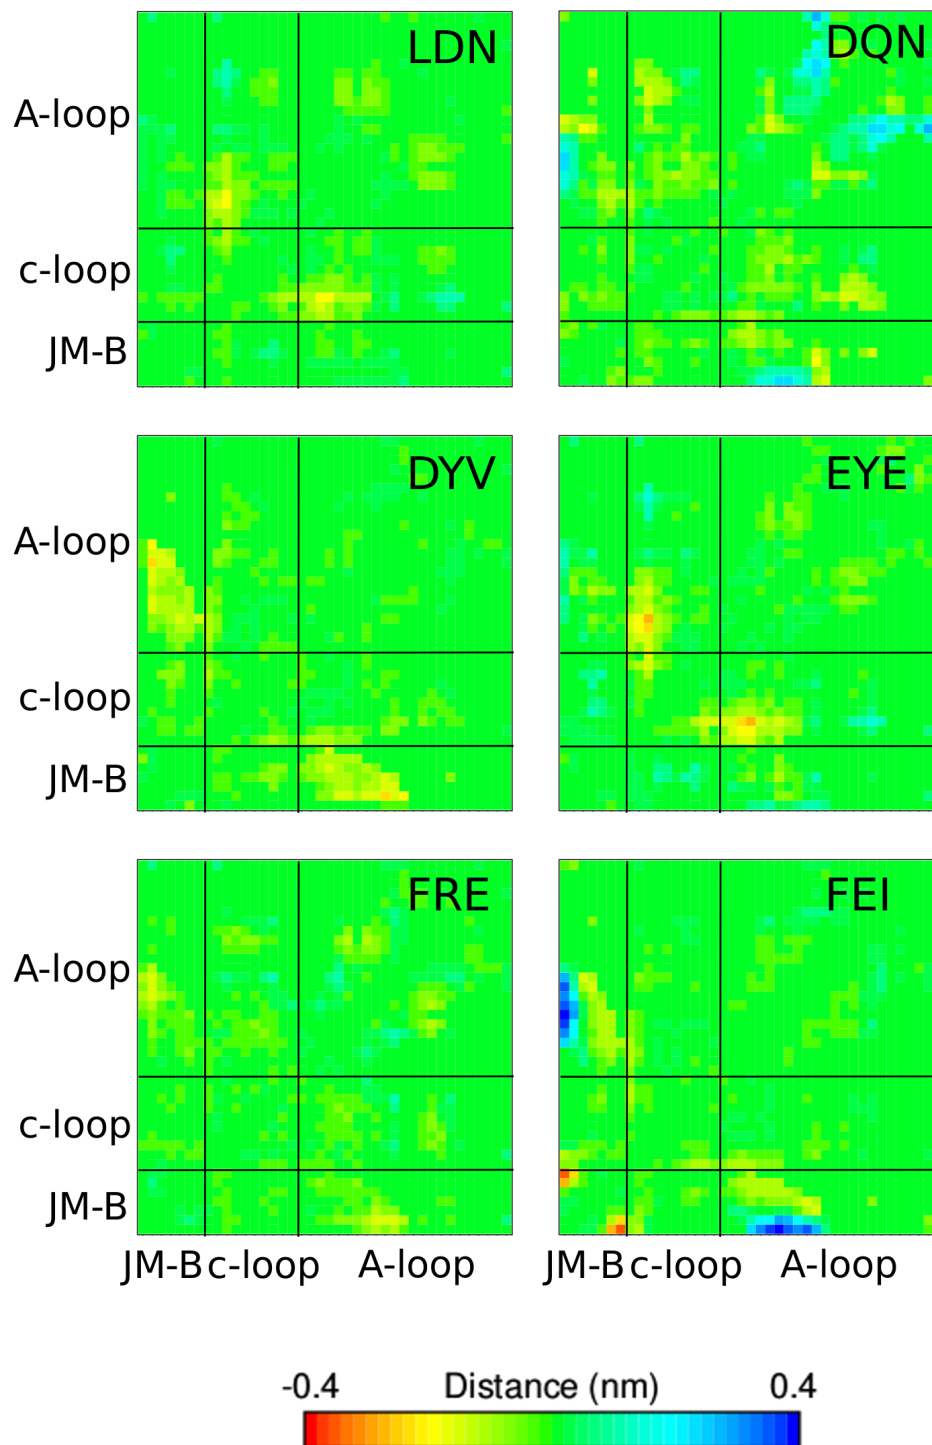

Figure 11: Contacts map difference calculated between the FLT3-ITD and the native protein. Distances are calculated using the  $C\alpha$  atoms.

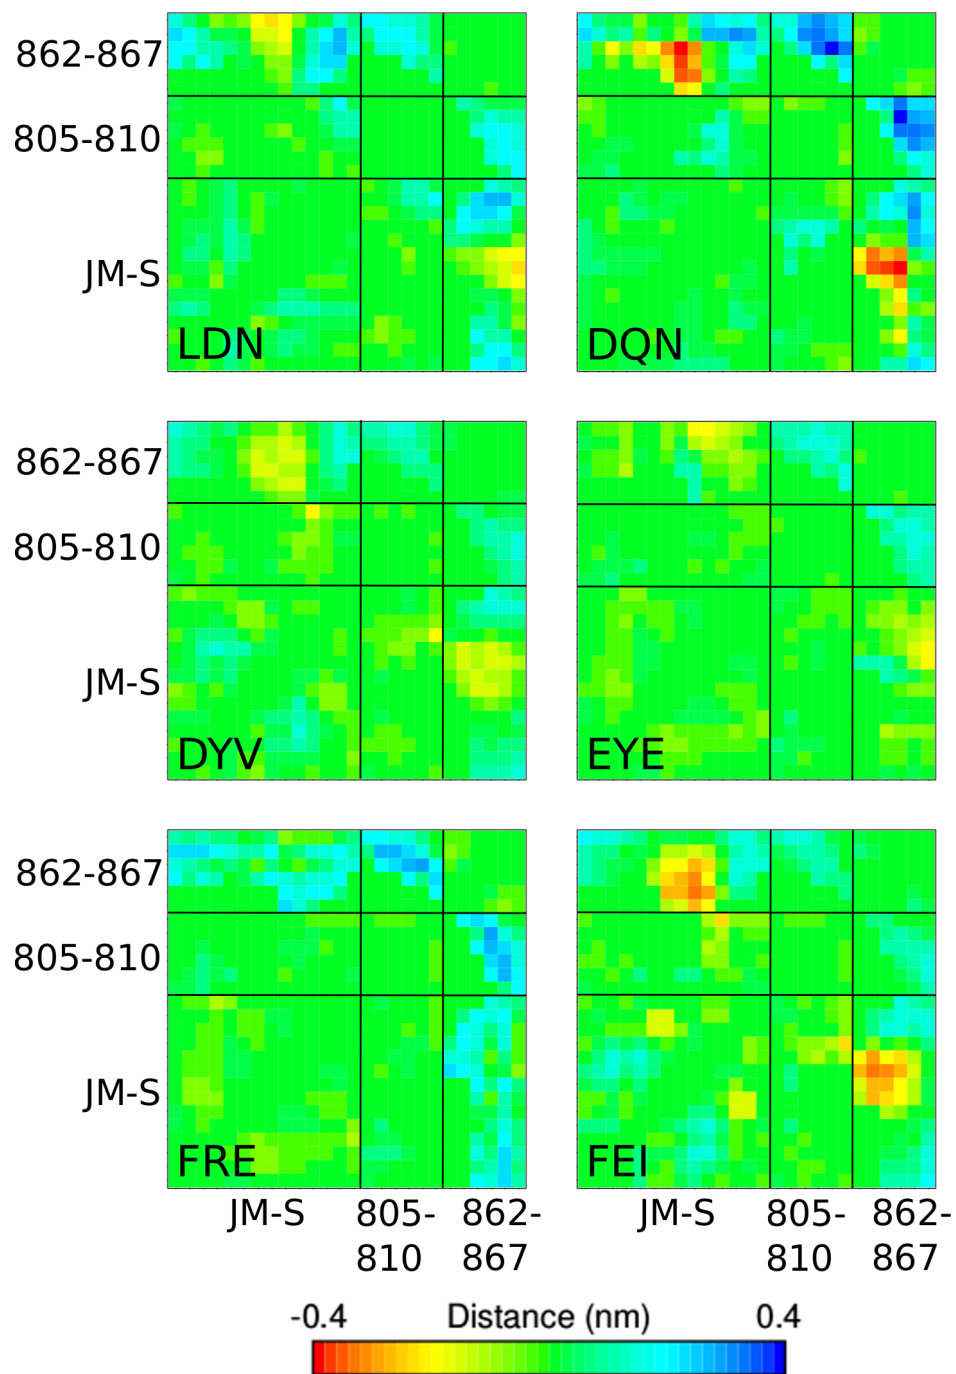

Figure 12: Contacts map difference calculated between the FLT3-ITD and the native protein. Distances are calculated using the  $C\alpha$  atoms.

This material is available free of charge via the Internet at <http://pubs.acs.org/>.
